# Supplementary material for: Development and Validation of a Predictive Nomogram for 30-Day Mortality in Sepsis Patients Coexisting with Malignant Tumors ： a Retrospective Cohort Study Using the MIMIC-IV Database
Source: Research Square preprint supplement (doi:10.21203/rs.3.rs-6007779/v1), 2025-02-18
Supplement: Supplementary file 1 [file 4f321ea75254194000ee5576.xlsx]

## Sheet: Sheet1
Variable	HR(95%CI)	P
Age, years	1.0091 (1.0056,1.0126)	< 0.001
Gender, male	0.91 (0.84,1)	0.052
Weight ,kg	0.99 (0.99,0.99)	< 0.001
MI	1.11 (0.97,1.26)	0.121
CHF	1.18 (1.07,1.3)	0.001
CPD	1.19 (1.08,1.31)	< 0.001
Liver Disease	1.07 (0.95,1.21)	0.279
Diabetes	1.0028 (0.9071,1.1086)	0.956
Renal Disease:	1.17 (1.05,1.3)	0.003
Aki
1	1.31 (1.12,1.54)	< 0.001
2	1.48 (1.3,1.68)	< 0.001
3	2.79 (2.47,3.16)	< 0.001
Heart Rate	1.02 (1.02,1.02)	< 0.001
Rrespiratory Rate	1.03 (1.02,1.04)	< 0.001
Mbp	0.98 (0.98,0.99)	< 0.001
Temperature	0.68 (0.62,0.75)	< 0.001
Spo2	0.98 (0.98,0.99)	< 0.001
APACHE III	1.02 (1.02,1.03)	< 0.001
SOFA	1.09 (1.07,1.11)	< 0.001
Cardiovascular:	1.61 (1.46,1.78)	< 0.001
RRT	1.28 (1.02,1.59)	0.03
Ventilation:	0.87 (0.8,0.96)	0.004
Wbc	1.0005 (0.9988,1.0023)	0.545
Hemoglobin	0.92 (0.9,0.94)	< 0.001
Platelets	1.0002 (0.9998,1.0005)	0.386
Aniongap	1.06 (1.05,1.07)	< 0.001
Bun	1.01 (1.01,1.01)	< 0.001
Calcium	1.03 (0.98,1.08)	0.223
Creatinine	1.07 (1.04,1.09)	< 0.001
Albumin	1 (1,1)	0.07
Glucose	0.9998 (0.9993,1.0003)	0.443
Sodium	0.97 (0.97,0.98)	< 0.001
Potassium	1.18 (1.12,1.23)	< 0.001
Inr	1.09 (1.07,1.12)	< 0.001
Pt	1.0099 (1.0072,1.0126)	< 0.001
Ptt	1.0031 (1.0015,1.0046)	< 0.001
Bilirubin	1.04 (1.03,1.05)	< 0.001
Lactate	1.09 (1.07,1.11)	< 0.001
Ph	0.29 (0.18,0.46)	< 0.001
Po2	0.9949 (0.9937,0.9961)	< 0.001
Pco2	0.9984 (0.9948,1.0019)	0.368
Abbreviations: MI, myocardial infarct; CHF, congestive heart failure; CPD, chronic pulmonary disease; MST, metastatic solid tumor; AKI, acute kidney i njury; Mbp, mean arterial pressure; SOFA, Sequential Organ Failure Assessment; Apache III, Acute Physiology and Chronic Health Evaluation III;ELS, extracorporeal life support; RRT, renal replacement therapy; Wbc,white blood cell; Bun, blood urea ni…
