# Supplementary material for: Development and Validation of a Predictive Nomogram for 30-Day Mortality in Sepsis Patients Coexisting with Malignant Tumors ： a Retrospective Cohort Study Using the MIMIC-IV Database
Source: Research Square preprint supplement (doi:10.21203/rs.3.rs-6007779/v1), 2025-02-18
Supplement: Supplementary file 2 [file 6c754581c3adee13ee2f80fc.xlsx]

## Sheet: Sheet1
Variables	Mean ± SD , Medians (IQRs) or Number (percentage, %)			p
	Primary cohort (n = 4196)	Training cohort ( (n = 2938)	Validation cohort (n = 1258)
Demographic characteristics
Age, Mean ± SD	66.6 ± 13.2	66.8 ± 13.2	66.3 ± 13.2	0.356
Gender, n (%)				0.437
Female	1607 (38.3)	1114 (37.9)	493 (39.2)
Male	2589 (61.7)	1824 (62.1)	765 (60.8)
Weight, Mean ± SD	79.0 ± 21.4	79.1 ± 20.9	78.8 ± 22.4	0.756
Comorbidities
MI, n (%)				0.295
No	3644 (86.8)	2541 (86.5)	1103 (87.7)
Yes	552 (13.2)	397 (13.5)	155 (12.3)
CHF, n (%)				0.237
No	3165 (75.4)	2201 (74.9)	964 (76.6)
Yes	1031 (24.6)	737 (25.1)	294 (23.4)
CPD, n (%)				0.659
No	3068 (73.1)	2154 (73.3)	914 (72.7)
Yes	1128 (26.9)	784 (26.7)	344 (27.3)
Liver Disease, n (%)				0.735
No	3567 (85.0)	2494 (84.9)	1073 (85.3)
Yes	629 (15.0)	444 (15.1)	185 (14.7)
Diabetes, n (%)				0.208
No	3087 (73.6)	2145 (73)	942 (74.9)
Yes	1109 (26.4)	793 (27)	316 (25.1)
Renal Disease, n (%)				0.035
No	3269 (77.9)	2263 (77)	1006 (80)
Yes	927 (22.1)	675 (23)	252 (20)
Malignant Cancer, n (%)				0.662
No	501 (11.9)	355 (12.1)	146 (11.6)
Yes	3695 (88.1)	2583 (87.9)	1112 (88.4)
MST, n (%)				0.16
No	2513 (59.9)	1780 (60.6)	733 (58.3)
Yes	1683 (40.1)	1158 (39.4)	525 (41.7)
Aki, n (%)				0.572
0	1190 (28.4)	833 (28.4)	357 (28.4)
1	583 (13.9)	422 (14.4)	161 (12.8)
2	1350 (32.2)	941 (32)	409 (32.5)
3	1073 (25.6)	742 (25.3)	331 (26.3)
Vital signs
Heart Rate, Mean ± SD	90.5 ± 16.8	90.3 ± 16.7	90.9 ± 17.0	0.356
Respiratory Rate, Mean ± SD	29.4 ± 6.9	29.4 ± 7.0	29.4 ± 6.7	0.964
Mbp, Mean ± SD	75.7 ± 10.2	75.8 ± 10.2	75.5 ± 10.2	0.327
Temperature, Mean ± SD	36.9 ± 0.5	36.9 ± 0.5	36.9 ± 0.5	0.985
Spo2, Mean ± SD	90.8 ± 6.9	90.8 ± 7.1	90.9 ± 6.6	0.738
Severity of illness scores
Apache III Median (IQR)	53.0 (40.0, 72.0)	52.0 (40.0, 71.8)	54.0 (41.0, 72.0)	0.104
Sofa, Median (IQR)	3.0 (2.0, 4.0)	3.0 (2.0, 4.0)	3.0 (2.0, 4.0)	0.676
ELS, n (%)
Cardiovascular, n (%)				0.719
No	3217 (76.7)	2248 (76.5)	969 (77)
Yes	979 (23.3)	690 (23.5)	289 (23)
RRT, n (%)				0.713
No	4039 (96.3)	2826 (96.2)	1213 (96.4)
Yes	157 ( 3.7)	112 (3.8)	45 (3.6)
Ventilation, n (%)				0.214
No	2565 (61.1)	1778 (60.5)	787 (62.6)
Yes	1631 (38.9)	1160 (39.5)	471 (37.4)
Laboratory results
Wbc, Median (IQR)	12.8 (8.2, 18.7)	12.8 (8.2, 18.7)	12.8 (8.2, 18.8)	0.942
Hemoglobin, Mean ± SD	9.3 ± 2.1	9.3 ± 2.1	9.3 ± 2.1	0.345
Platelets, Median (IQR)	158.0 (92.0, 242.0)	158.0 (90.2, 241.0)	160.5 (97.0, 244.8)	0.378
Aniongap, Mean ± SD	17.0 ± 5.0	17.0 ± 5.0	17.0 ± 5.0	0.973
Bun, Median (IQR)	25.0 (17.0, 40.0)	25.0 (17.0, 40.0)	24.0 (17.0, 39.8)	0.261
Calcium, Mean ± SD	8.5 ± 1.0	8.6 ± 1.0	8.5 ± 1.0	0.137
Creatinine, Median (IQR)	1.2 (0.8, 1.8)	1.2 (0.8, 1.8)	1.1 (0.8, 1.8)	0.115
Glucose, Median (IQR)	147.0 (120.0, 192.2)	148.0 (119.0, 194.0)	146.5 (121.0, 189.0)	0.765
Sodium, Mean ± SD	139.1 ± 5.1	139.1 ± 5.2	138.9 ± 4.9	0.159
Potassium, Mean ± SD	4.6 ± 0.9	4.6 ± 0.9	4.6 ± 0.9	0.772
Inr, Median (IQR)	1.4 (1.2, 1.8)	1.4 (1.2, 1.8)	1.4 (1.2, 1.7)	0.205
Pt, Median (IQR)	15.4 (13.4, 19.1)	15.4 (13.5, 19.3)	15.4 (13.3, 18.6)	0.164
Aptt, Mean ± SD	43.3 ± 27.0	43.8 ± 27.4	42.1 ± 25.8	0.058
Bilirubin, Median (IQR)	1.2 (0.6, 2.2)	1.2 (0.6, 2.3)	1.1 (0.6, 2.1)	0.098
Lactate, Median (IQR)	2.2 (1.7, 3.2)	2.2 (1.7, 3.2)	2.2 (1.6, 3.2)	0.585
Ph, Mean ± SD	7.3 ± 0.1	7.3 ± 0.1	7.3 ± 0.1	0.76
Po2, Mean ± SD	95.5 ± 47.0	96.3 ± 48.0	93.6 ± 44.4	0.091
Pco2, Mean ± SD	45.3 ± 13.2	45.2 ± 13.2	45.5 ± 13.3
Abbreviations: SD, standard deviation; IQR, interquartile range; MI, myocardial infarct; CHF, congestive heart failure; CPD, chronic pulmonary disease; MST, metastatic solid tumor; AKI, acute kidney i njury; Mbp, mean arterial pressure; SOFA, Sequential Organ Failure Assessment; Apache III, Acute Physiology and Chronic Health Evaluation III;ELS, extracorporeal life support; RRT, renal replacement…
