# Supplementary material for: Development and Validation of a Predictive Nomogram for 30-Day Mortality in Sepsis Patients Coexisting with Malignant Tumors ： a Retrospective Cohort Study Using the MIMIC-IV Database
Source: Research Square preprint supplement (doi:10.21203/rs.3.rs-6007779/v1), 2025-02-18
Supplement: Supplementary file 3 [file d3aebf9b20bbcf2f3be46d4a.xlsx]

## Sheet: Sheet1
	Model 1				Model 2				Model 3
Center and variable	β	Adjusted OR	P		β	Adjusted OR	P		β	Adjusted OR	P
		(95% CI)				(95% CI)				(95% CI)
(Intercept)	10.891	-	-		-11.269	-	-		11.6951	-	-
Age	-	-	-		0.008	1.01 (1~1.02)	0.033		-	-	-
Gender	-	-	-		0.263	1.3 (1.07~1.58)	0.009		-	-	-
Weight	-0.016	0.98 (0.98~0.99)	<0.001		-0.018	0.98 (0.98~0.99)	<0.001		-0.0161	0.98 (0.98~0.99)	<0.001
CPD	-	-	-		0.136	1.15 (0.93~1.41)	0.198		-	-	-
Diabetes	-	-	-		0.287	1.33 (1.07~1.65)	0.009		-	-	-
Aki1	0.249	1.28 (0.94~1.74)	0.111		0.191	1.21 (0.88~1.66)	0.235		0.2901	1.34 (0.98~1.82)	0.066
Aki2	0.453	1.57 (1.23~2.01)	<0.001		0.462	1.59 (1.23~2.05)	<0.001		0.5145	1.67 (1.3~2.15)	<0.001
Aki3	1.025	2.79 (2.11~3.69)	<0.001		0.979	2.66 (1.98~3.58)	<0.001		1.0731	2.92 (2.2~3.89)	<0.001
Heart_Rate	0.015	1.02 (1.01~1.02)	<0.001		0.015	1.02 (1.01~1.02)	<0.001		0.0131	1.01 (1.01~1.02)	<0.001
Temperature	-0.375	0.69 (0.57~0.82)	<0.001		-0.373	0.69 (0.57~0.83)	<0.001		-0.3328	0.72 (0.6~0.86)	<0.001
Spo2	-	-	-		-0.019	0.98 (0.97~0.99)	0.004		-0.024	0.98 (0.96~0.99)	<0.001
ApacheIII	0.029	1.03 (1.03~1.03)	<0.001		0.03	1.03 (1.03~1.04)	<0.001		0.0303	1.03 (1.03~1.04)	<0.001
Cardiovascular	-	-	-		0.371	1.45 (1.16~1.81)	0.001		-	-	-
RRT	-	-	-		-0.388	0.68 (0.4~1.16)	0.157		-	-	-
Ventilation	-	-	-		-0.154	0.86 (0.69~1.07)	0.172		-0.2669	0.77 (0.63~0.93)	0.008
Aniongap	-	-	-		0.062	1.06 (1.04~1.09)	<0.001		-	-	-
Bun	0.019	1.02 (1.01~1.03)	<0.001		0.017	1.02 (1.01~1.02)	<0.001		0.0189	1.02 (1.01~1.02)	<0.001
Calcium	-	-	-		0.056	1.06 (0.97~1.16)	0.225		-	-	-
Creatinine	-0.309	0.73 (0.67~0.81)	<0.001		-0.342	0.71 (0.64~0.79)	<0.001		-0.3213	0.73 (0.66~0.8)	<0.001
Glucose	-0.002	0.99(0.99~0.99)	<0.001		-0.003	0.99(0.99~0.99)	<0.001		-0.0019	0.99(0.99~0.99)	<0.001
Sodium	-	-	-		-0.023	0.98 (0.96~0.99)	0.009		-	-	-
Bilirubin	-	-	-		0.02	1.02 (1~1.04)	0.09		-	-	-
Ph	-	-	-		3.302	27.16 (6.81~108.26)	<0.001		-	-	-
Po2	-	-	-		-0.002	0.99(0.99~0.99)	0.132		-	-	-
Pco2	-	-	-		0.019	1.02 (1.01~1.03)	<0.001		-	-	-
	C1-index	X1-squared	H-L P		C2-index	X2-squared	H-L P		C3-index	X3-squared	H-L P
Training cohort	0.785	11.84	0.159		0.802	5.61	0.691		0.79	5.44	0.709
Validation cohort	0.789	13.18	0.106		0.793	11.44	0.178		0.79	9.32	0.316
