# Supplementary material for: Development and Validation of a Predictive Nomogram for 30-Day Mortality in Sepsis Patients Coexisting with Malignant Tumors ： a Retrospective Cohort Study Using the MIMIC-IV Database
Source: Research Square preprint supplement (doi:10.21203/rs.3.rs-6007779/v1), 2025-02-18
Supplement: Supplementary file 4 [file dbbea8e4b0243ca963f18bfd.xlsx]

## Sheet: Sheet1
Table S1: Percentage of missing data in the variables of interest
		MIMIC-Ⅳ (n=4196)
	Miss frequencies	Miss percentage
Participants
Age, Mean ± SD	0	0
Gender, n (%)	0	0
Weight, Mean ± SD	28	0.6673							3	7	5	2	3	18		38
Comorbidities
MI, n (%)	0	0
CHF, n (%)	0	0
CPD, n (%)	0	0
Liver Disease, n (%)	0	0
Diabetes, n (%)	0	0
Renal Disease, n (%)	0	0
Malignant Cancer, n (%)	0	0
MST, n (%)	0	0
Aki, n (%)	0	0
Vital signs
Heart Rate, Mean ± SD	7	0.1668
Respiratory Rate, Mean ± SD	9	0.2145
Mbp, Mean ± SD	7	0.1668
Temperature, Mean ± SD	57	1.3584
Spo2, Mean ± SD	9	0.2145
Severity of illness
Apache III Median (IQR)	0	0
Sofa, Median (IQR)	0	0
ELS, n (%)
Cardiovascular, n (%)	192	4.5758
RRT, n (%)	0	0
Ventilation, n (%)	0	0
Laboratory results
Wbc, Median (IQR)	13	0.3098
Hemoglobin, Mean ± SD	10	0.2383
Platelets, Median (IQR)	11	0.2622
Aniongap, Mean ± SD	10	0.2383
Bun, Median (IQR)	7	0.1668
Calcium, Mean ± SD	107	2.55
Creatinine, Median (IQR)	6	0.143
Glucose, Median (IQR)	11	0.2622
Sodium, Mean ± SD	7	0.1668
Potassium, Mean ± SD	7	0.1668
Inr, Median (IQR)	327	7.7931
Pt, Median (IQR)	327	7.7931
Aptt, Mean ± SD	344	8.1983
Bilirubin, Median (IQR)	1324	31.5539
Lactate, Median (IQR)	1760	41.9447
Ph, Mean ± SD	1387	33.0553
Po2, Mean ± SD	1386	33.0315
Pco2, Mean ± SD	1387	33.0553
Abbreviations: SD, standard deviation; IQR, interquartile range; MI, myocardial infarct; CHF, congestive heart failure; CPD, chronic pulmonary disease; MST, metastatic solid tumor; AKI, acute kidney i njury; Mbp, mean arterial pressure; SOFA, Sequential Organ Failure Assessment; Apache III, Acute Physiology and Chronic Health Evaluation III;ELS, extracorporeal life support; RRT, renal replacement…
